# Supplementary material for: Crossed-beam and theoretical studies of multichannel nonadiabatic reactions: branching fractions and role of intersystem crossing for O(3P) + 1,3-butadiene
Source: Royal Society of Chemistry journal article supplement (doi:10.1039/d2fd00037g), 2022-01-01
Supplement: d2fd00037g2.pdf [file d2fd00037g2.pdf]

**Electronic Supporting Information (ESI) for the paper:**

**Crossed-Beam and Theoretical Studies of Multichannel  
Nonadiabatic Reactions: Branching Fractions and Role of  
Intersystem Crossing for O(<sup>3</sup>P) + 1,3-Butadiene**

C. Cavallotti,<sup>1\*</sup> A. Della Libera,<sup>1</sup> Chong-Wen Zhou,<sup>2,3</sup> P. Recio,<sup>4</sup> A. Caracciolo,<sup>4</sup> N.  
Balucani<sup>4</sup> and P. Casavecchia<sup>4\*</sup>

<sup>1</sup>*Dipartimento di Chimica, Materiali e Ingegneria Chimica "Giulio Natta", Politecnico di Milano, 20131 Milano, Italy. E-mail: [carlo.cavallotti@polimi.it](mailto:carlo.cavallotti@polimi.it)*

<sup>2</sup>*School of Energy and Power Engineering, Beihang University, Beijing 100191, PR China*

<sup>3</sup>*Combustion Chemistry Centre, School of Chemistry, Ryan Institute, National University of Ireland, Galway, Galway H91TK33, Ireland*

<sup>4</sup>*Dipartimento di Chimica, Biologia e Biotecnologie, Università degli Studi di Perugia, 06123 Perugia, Italy. E-mail: [piergiorgio.casavecchia@unipg.it](mailto:piergiorgio.casavecchia@unipg.it)*

**This file contains:**

S1. Crossed-beam experimental results for O(<sup>3</sup>P) + 1,3-butadiene

S2. Thermal Rate constants (0.1, 1, 10 atm and 300-2200 K)

S3. Master Equation Inputs

## S1. Crossed-beam experimental results for O(<sup>3</sup>P) + 1,3-Butadiene

The bimolecular reaction of O(<sup>3</sup>P) with 1,3-Butadiene exhibits a large variety of energetically open (exothermic) reaction channels. Experimentally, using the crossed molecular beam (CMB) technique with mass-spectrometric (MS) detection and time-of-flight (TOF) analysis, and exploiting soft electron ionization for product detection as described in the main text, we have probed the following eight channels at  $E_c=32.6$  kJ/mol:

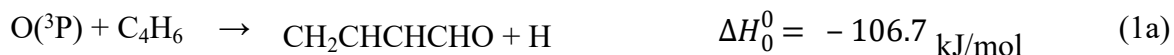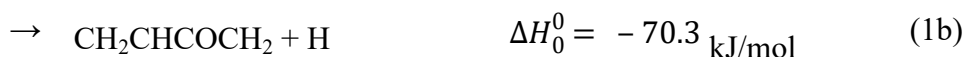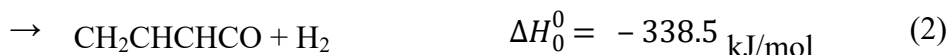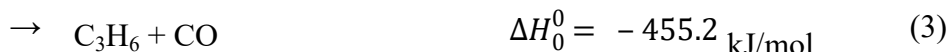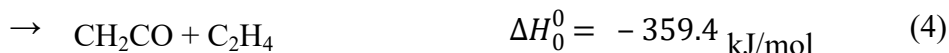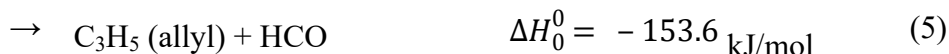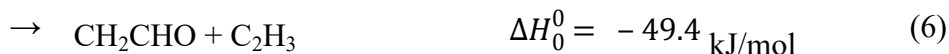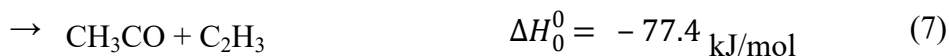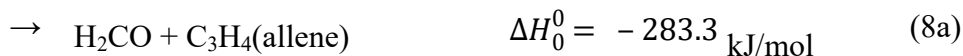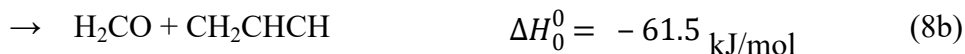

(vinylmethylene)

Here, the reaction enthalpies are those derived from the present electronic structure calculations (accuracy  $\pm 4$  kJ/mol) (see Fig. 1 in main text).

As discussed in the main text, there also two different  $\text{CH}_3$  elimination channels, leading to  $\text{CH}_3 + \text{CH}_2\text{CHCO}$  and  $\text{CH}_3 + \text{CHCHCHO}$ , which are also exothermic ( $\Delta H_0^0 = -122.6$  and  $-33.5$  kJ/mol, respectively) (see Fig. 1 in main text). We attempted to probe these channels by detecting the methyl radical ( $m/z=15$ ). However, no reactive signal was observed within our sensitivity, and this puts its BF at  $\leq 1\%$  -  $2\%$ . Neither the direct H abstraction forming OH has been observed at  $m/z=17$ . The OH channel, even though is slightly

exothermic ( $\Delta H_0^0 = -9.2 \text{ kJ/mol}$ ), is characterized by a high entrance barrier of 31.8 kJ/mol, which makes it negligible under our experimental conditions of  $E_c = 32.6 \text{ kJ/mol}$ . This conclusion is corroborated by the theoretical kinetic calculations that have determined the channel specific abstraction rate constant as a function of temperature to be negligible at room temperature and still much lower than the addition rate constants even at 1000 K (see Fig. 4 in Main Text).

We wish to note that the small percentage ( $\leq 10\%$ ) of  $O(^1D)$  present in the atomic oxygen beam<sup>1</sup> is expected to contribute negligibly to the results because the reactivity of  $O(^3P)$  (dominant in the beam) becomes comparable to that of  $O(^1D)$  at this high collision energy, and presumably, as for the case of the reaction  $O + C_2H_2$ ,<sup>2</sup> the  $O(^1D)$  reaction mainly would produce  $OH + C_5H_5$ . Therefore, the contribution of  $O(^1D)$  is assumed to be negligible in the present study.

The velocity vector (so called “Newton”) diagram of the CMB experiment is depicted in Fig. S1a. It describes the kinematics of the reactive system. There, the circles superimposed on the diagram, and concentric to the center-of-mass (CM) position, delimit the maximum CM velocity that the indicated primary products can attain by assuming that all the available energy (given by  $E_c - \Delta H_0^0$ ) is channeled into product translational energy. From this diagram we can see that the heavy co-product of channel (1) is extremely enhanced in the LAB frame because of the very favorable  $CM \rightarrow LAB$  transformation Jacobian<sup>3,4</sup> for the heavy co-product of the H channel with respect to lighter products left by a heavy co-product (see below).

We have observed reactive signal at the following mass-to-charge ( $m/z$ ) ratios:  $m/z=69$  ( $C_4H_5O^+$ ), 68 ( $C_4H_4O^+$ ), 43 ( $C_2H_3O^+$ ), 42 ( $C_3H_6^+$ ,  $CH_2CO^+$ ), 41 ( $C_3H_5^+$ ), 30 ( $CH_2O^+$ ), and 29 ( $HCO^+$ ), with relative intensities at the CM angle (using 17 eV electron energy) of 0.04, 0.21, 0.02, 0.14, 1.00, 0.12 and 0.13, respectively. The product LAB angular distributions,  $N(\Theta)$ , were acquired only at  $m/z=69$ , 68, 43, 42, 41, and 29, while not at  $m/z=30$  for poor S/N reasons; they are reported in Fig. 1b. Due to the low signal-to-noise (S/N), at  $m/z=69$  and 43 only angular distributions were measured. Instead for  $m/z=30$ , only (two) TOF distribution were recorded because of the low signal-to-noise (S/N) ratio in the angular distribution. Most measurements were carried out exploiting soft electron ionization at 17 eV electron energy, which was sufficient to suppress most of the interferences from dissociative ionization processes of

reactants and background gases. However, for some masses data were collected at both 70 eV and 17 eV for normalization purposes.

The Figures S2a and S2b show the TOF distributions at  $m/z=68$  and  $m/z=41$ , respectively, for six different LAB angles, while Fig. S2c shows the TOF data at  $m/z=42$  at only two LAB angles. The TOF spectra at  $m/z=29$  at four different LAB angles are instead shown in Fig. S3(*rhs*),

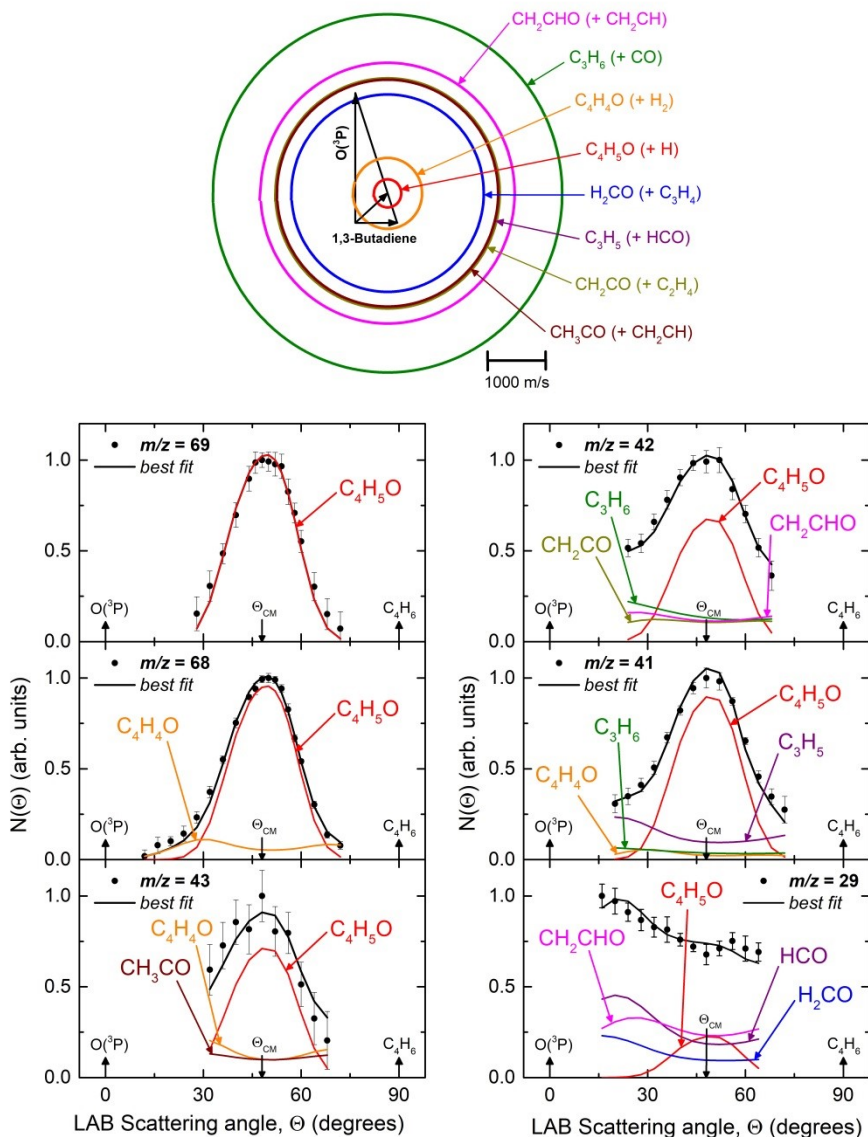

**Fig S1** (a) Velocity vector diagram for the  $O(^3P)+1,3$ -butadiene reaction ( $E_c=32.6$  kJ/mol) where the color coded circles concentric to the CM delimit the maximum velocity that the indicated primary products can attain in the CM frame on the basis of energy and momentum conservation, assuming that all the total available energy is channeled into recoil energy of the products (i.e., assuming that the products are formed in their lowest ro-vibrational state). Eight different reactive channels were identified,  $C_4H_5O+H$  (red);  $C_4H_4O+H_2$  (orange);  $C_3H_6+CO$  (green);  $C_3H_5+HCO$  (purple);  $CH_2CO+C_2H_4$  (green-olive);  $CH_2CHO+C_2H_3$  (pink),  $CH_3CO+CH_2CH$  (garnet), and

$\text{H}_2\text{CO}+\text{C}_3\text{H}_4$  (blue). (b) LAB angular distributions  $N(\Theta)$  measured at  $m/z=69, 68, 43$  (*lhs*) and  $42, 41, 29$  (*rhs*). The black solid line superimposed on the experimental data (black dots) corresponds to the calculated global best-fit using the CM functions depicted in Fig. S4. The distinct contributions to the calculated global  $N(\Theta)$  are colored coded as in Fig. 1a and indicated with the formula of the corresponding product. Experimental error bars represent  $\pm 1\sigma$ .

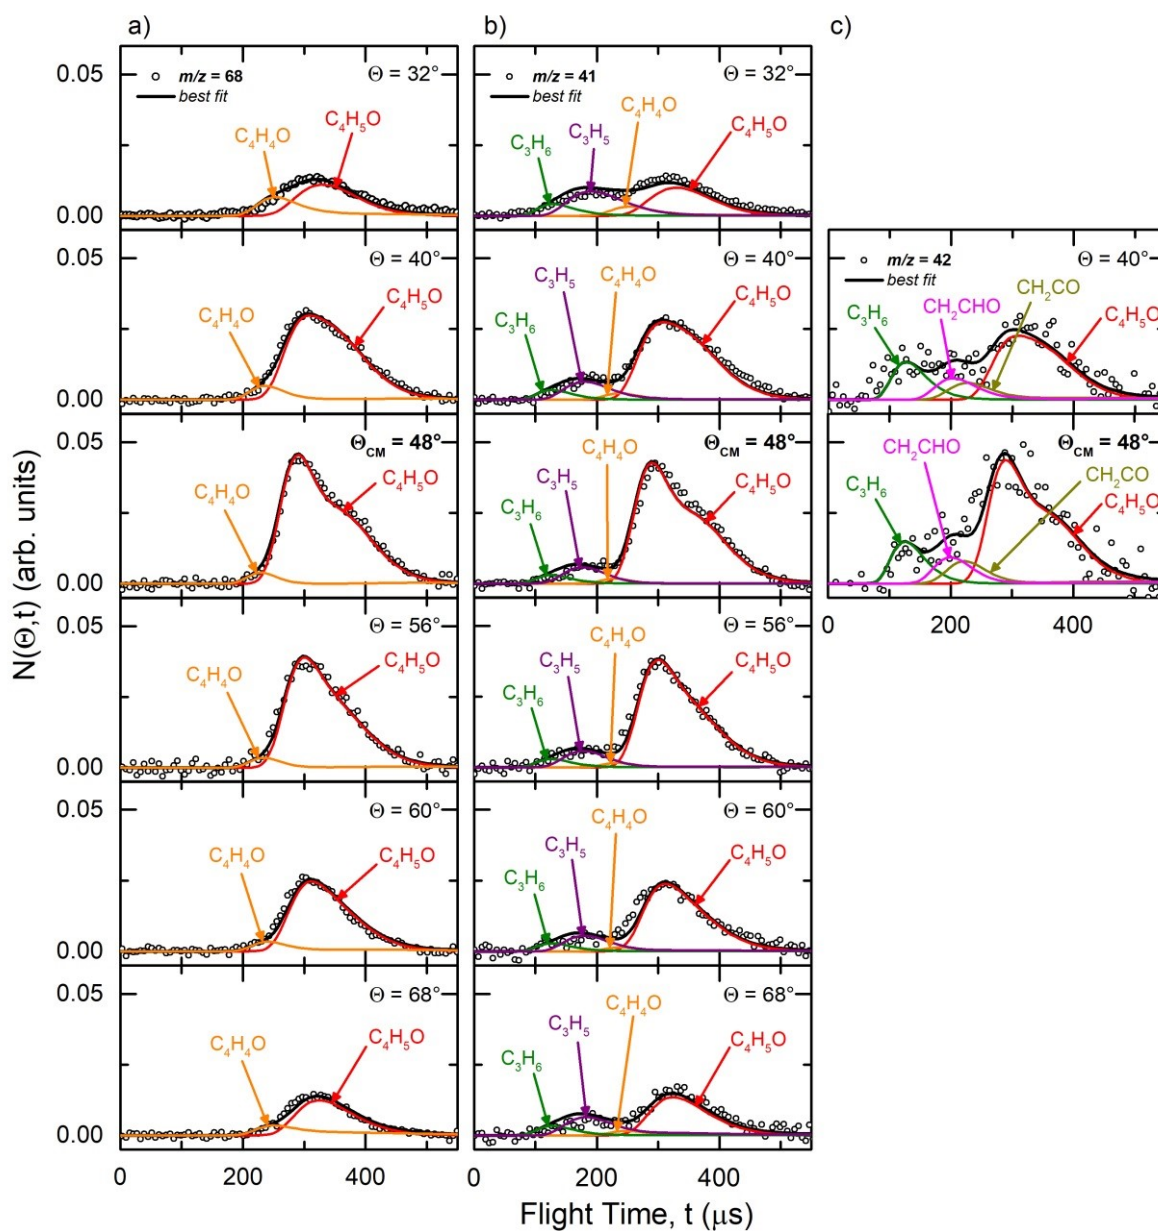

**Fig S2** Product TOF distributions for (a)  $m/z=68$  (at 70 eV), (b)  $m/z=41$  (at 17 eV), and (c)  $m/z=42$  (at 17 eV) at the indicated LAB angles  $\Theta$ . The distinct contributions of the different products contributing at each of the three

masses are indicated. Color coding as in Fig. S1. Note that the integrated signal at  $\Theta_{\text{CM}}=48^\circ$  (at 17 eV) for  $m/z=41$  is seven times larger than for  $m/z=42$ , and five times larger than for  $m/z=68$ , as reflected in the S/N of the spectra.

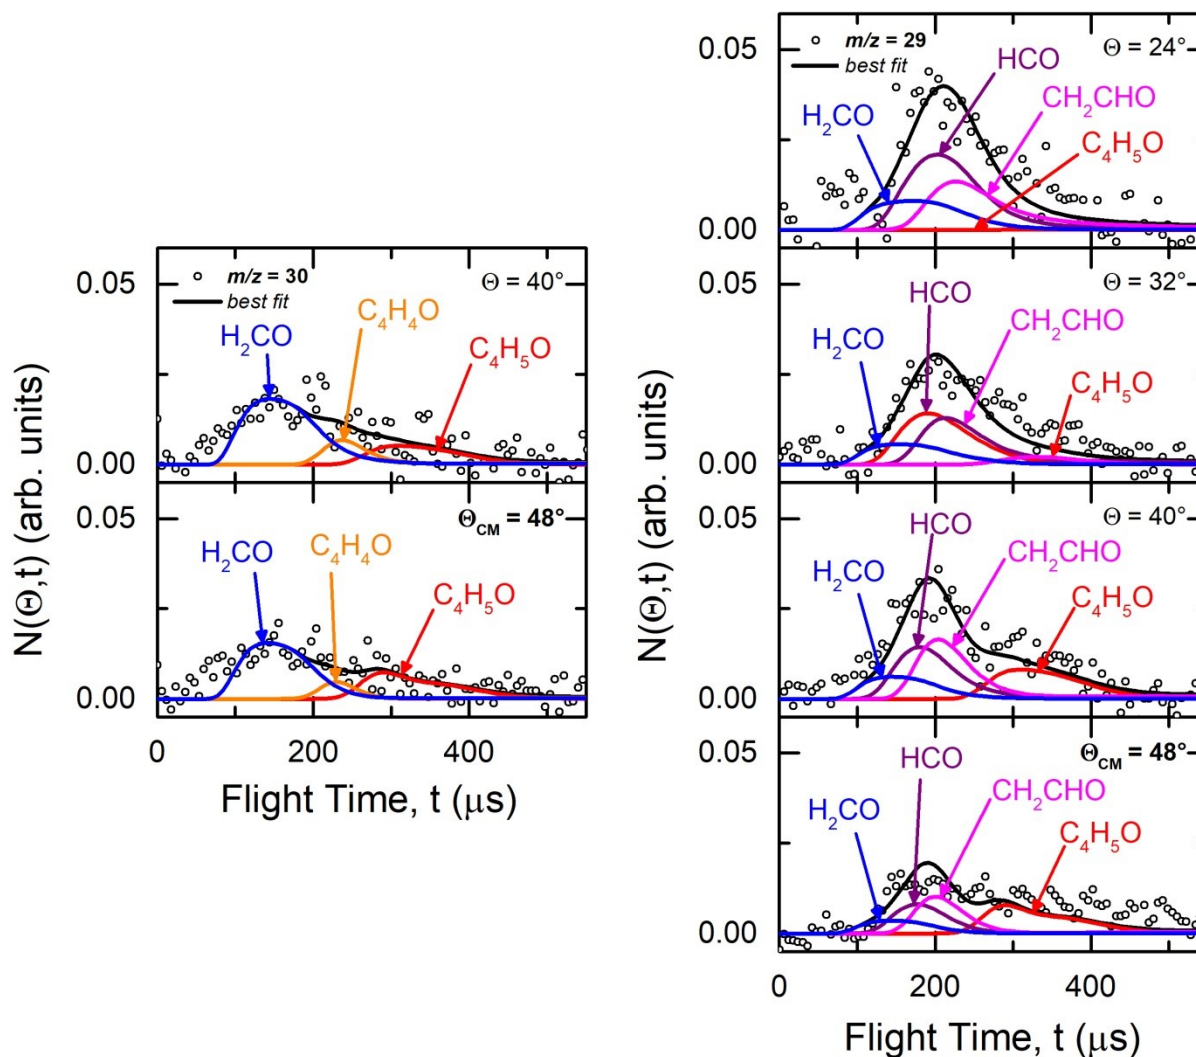

**Fig S3** Product TOF distributions measured for  $m/z=30$  at LAB angles of  $40^\circ$  and  $48^\circ$  with hard ionization (70 eV) (*lhs*) and  $m/z=29$  at LAB angles  $24^\circ$ ,  $32^\circ$ ,  $40^\circ$ , and  $48^\circ$  with soft ionization (17 eV) (*rhs*). Distinct product contributions are indicated. Color coding as in Figs. S1 and S2.

and those at  $m/z=30$  at two LAB angles in Fig. S3(*lhs*). Typical measuring times ranged from two to four hours for each TOF spectrum. The black continuous curves in Figs S1-S3 represent the global best-fit for the indicated  $m/z$  data, while the labeled color coded curves are the partial



contributions from the various indicated products, when using the best-fit CM product angular,  $T(\theta)$ , and translational energy,  $P(E_{\text{T}})$ , distributions reported in Fig. S4.

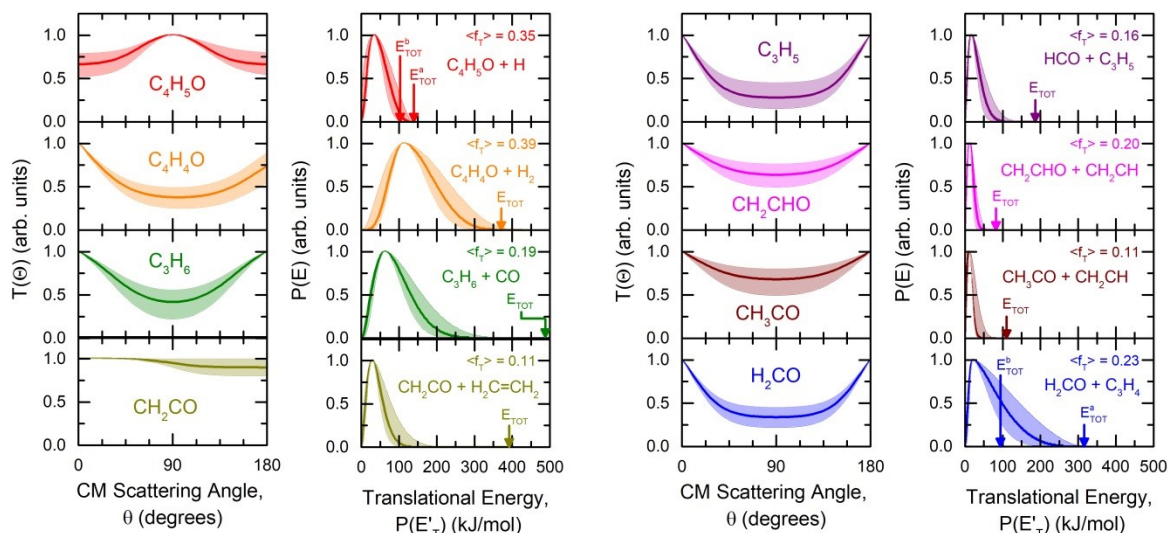

**Fig. S4** CM best-fit functions for the  $\text{O}(^3\text{P}) + 1,3\text{-butadiene}$  reaction at  $E_c=32.6$  kJ/mol. 1<sup>st</sup> and 3<sup>rd</sup> panel (from left): best-fit CM angular distributions of  $\text{C}_4\text{H}_5\text{O}$ ,  $\text{C}_4\text{H}_4\text{O}$ , propene ( $\text{C}_3\text{H}_6$ ), ketene ( $\text{CH}_2\text{CO}$ ), allyl ( $\text{C}_3\text{H}_5$ ), vinyoxy ( $\text{CH}_2\text{CHO}$ ), acetyl ( $\text{CH}_3\text{CO}$ ), and formaldehyde ( $\text{H}_2\text{CO}$ ). 2<sup>nd</sup> and 4<sup>th</sup> panel: best-fit CM translational energy distributions for each corresponding channel. Color coding as in Figs. S1-S3. The total energy ( $E_{\text{TOT}}$ ) and the average translational energy fraction ( $\langle f_{\text{T}} \rangle$ ) (referred to the most exothermic isomeric channel) determined for each reaction channel are indicated. In the top and bottom sub-panels of 2<sup>nd</sup> and 4<sup>th</sup> panel (from left) the two arrows refer to the two different isomeric channels (1a) and (1b), and (8a) and (8b), respectively. The shaded areas represent the error bars determined for the best-fit CM functions.

The information content of the  $N(\Theta)$  and  $N(\Theta, t)$  data about the complex reaction dynamics of  $\text{O}(^3\text{P}) + 1,3\text{-butadiene}$  has been discussed in some detail in the Main Text. The derived best-fit CM functions (see Fig. S4) contain all the information about the dynamics of formation of the 8 competing product channels.

The interpretation of the CMB results has been synergistically assisted by high-level electronic structure calculations of the underlying triplet and singlet PESs for the  $\text{C}_4\text{H}_6\text{O}$  system (see Fig. 1 in Main Text). Besides identifying 8 competing product channels, we have been able to also estimate experimentally the branching fractions of the different product channels (see Table 1 in Main Text). Furthermore, for some channels we have been able to observe also peculiar dynamical features, such as in the case of the H-displacement channels (1).

### **Stereodynamics of channels (1): $O(^3P) + C_4H_6 \rightarrow C_4H_5O + H$ .**

Experimentally it was not possible to distinguish the relative contributions of channel (1a) and channel (1b), being the dynamics similar and the resolution of this experiment not sufficient. However, theory has predicted that at the experimental  $E_c$  channel (1b) gives a contribution of about 15% to the total H yield (the contribution increases with increasing  $E_c$  (or temperature)) (see Table 1 in Main Text). The fact that the  $T(\theta)$  of the H-displacement channel is different from that of all the other channels and, in particular, has a maximum at  $\theta=90^\circ$  rather than a minimum (see Fig. S4), indicates that the H atom departs orthogonally to the molecular plane at the transition state.<sup>5-7</sup> This is nicely corroborated by the theoretical finding that the calculated geometry of the exit transition state, following both O atom attack to the terminal carbon (most favored) and O atom attack to the central carbon, indicates that the angle that the H-atom forms with respect to the molecular plane, when leaving <sup>3</sup>TS2 (following C1 attack) is about  $105^\circ$ , while it is about  $88^\circ$  when it leaves <sup>3</sup>TS10 following C2 attack (see Fig. S5 and also Fig. 1a of the triplet PES in the Main Text). Being the  $T(\theta)$  perfectly symmetric, *i.e.*, having the same intensity at  $\theta=0^\circ$  (forward direction with respect to the incoming O atom in the CM) and  $\theta=180^\circ$  (backward direction), indicates that the reaction forming H atoms on the triplet PES proceeds via a long-lived complex mechanism,<sup>5-7</sup> that is via a complex (<sup>3</sup>W1 and <sup>3</sup>W2 in our case, see Fig. 1a in Main Text) whose average lifetime is longer ( $\geq 5-6$ ) than the average rotational period of the dissociating complex. Notably, a similar sideways scattering dynamics has been observed also for the  $CH_3$  elimination channel in the reaction  $O(^3P) + \text{toluene}$  where, at a comparable  $E_c$ , the  $CH_3$  group leaves the aromatic ring at nearly  $90^\circ$  at the exit transition state, forming  $CH_3 + C_6H_5O$  (phenoxy).<sup>8</sup>

It is also worth commenting that the  $C_4H_5O + H$  channel, despite the very high signal in the laboratory of the  $C_4H_5O$  co-product (detected at its parent mass and its daughter ion masses) contributes for less than 10% to the total product yield of the  $O(^3P)+1,3\text{-butadiene}$  reaction at  $E_c=32.6$  kJ/mol (see Table 1 in Main Text). In particular, the main daughter ion of  $C_4H_5O$  occurs at  $m/z=41$  ( $C_3H_5^+$ ) which arises by the following dissociative ionization process (even at 17 eV):  $C_4H_5O + e^- \rightarrow C_3H_5^+ + CO$ . The high intensity at  $m/z=41$  due to the H displacement channel is



well visible both in the N( $\Theta$ ) and in the TOF spectra. The fast peak at  $m/z=41$  at around 180  $\mu\text{s}$ , much faster than the  $\text{C}_3\text{H}_5^+$  component from channel (1) via the above dissociative ionization process, appears much less intense in the LAB frame with respect to the latter, despite the  $\text{C}_3\text{H}_5$  (allyl) ( $m/z=41$ ) product from channel (5) has a reactive integral cross section about a factor of 6 larger, the reason being that by momentum conservation  $\text{C}_3\text{H}_5$  from channel (5) is scattered over a much larger Newton circle than  $\text{C}_4\text{H}_5\text{O}$  (detected at  $m/z=41$ ) from channel (1). A similar situation occurs also for channel (6) ( $\text{C}_3\text{H}_6 + \text{CO}$ ), but in this case the fragmentation of  $\text{C}_4\text{H}_5\text{O}$  to  $m/z=42$  is much lower than at  $m/z=41$  (see Fig. S2c).

It should also be noted that, because the detector acceptance angle is the same for all channels, about  $1^\circ$ , in this type of experiments, at a given LAB angle a much smaller slice of a large Newton circle is being detected with respect to the case of a small Newton circle. We recall that the actual product distribution of a product in the LAB as well in the CM, occurs on a 3-D sphere because of the cylindrical symmetry of the scattering process, when using non polarized atomic and molecular beams, as in our case.<sup>9</sup> In fact, because of the cylindrical symmetry of the scattering process, detection can be made, using a high angular resolution (typically  $1^\circ$ ), in the plane of the sphere at the equator, that is the plane of a circle (see Fig. S1a), by rotating the detector in the plane defined by the two intersecting molecular beams, around the axis orthogonal to the collision plane and passing through the collision center.<sup>3,4,9</sup>

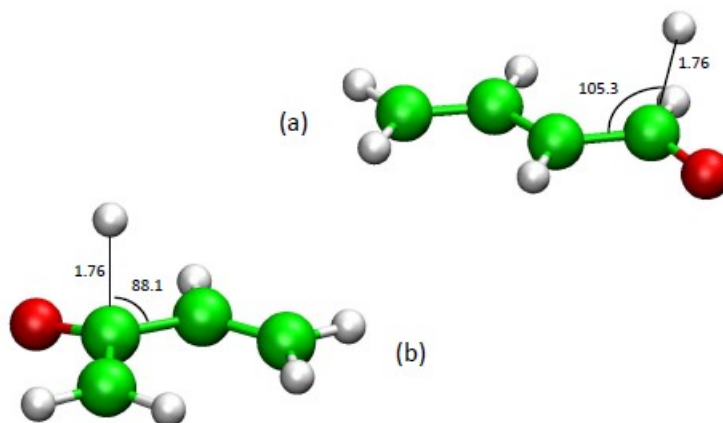

**Fig. S5** Transition state structures from the present electronic structure calculations (see sect. 2.2 in Main Text). (a):  $^3\text{TS}_2$ , (b):  $^3\text{TS}_{10}$  (see triplet PES in Fig. 1a of Main Text). The C-H distance at the transition state is in Å.

## S2. Thermal Rate constants (0.1, 1, 10 atm and 300-2200 K)

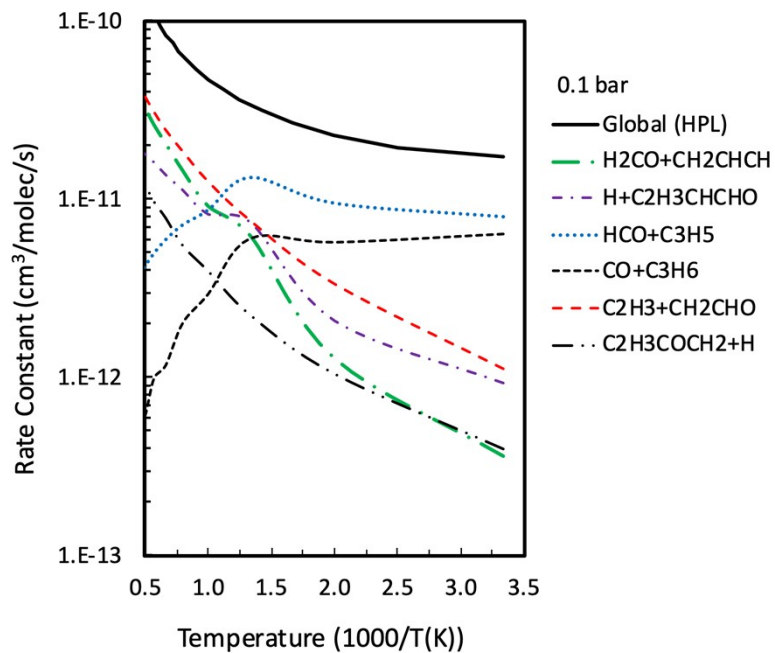

Fig. S6. Channel specific rate constants computed as a function of temperature at 0.1 bar.

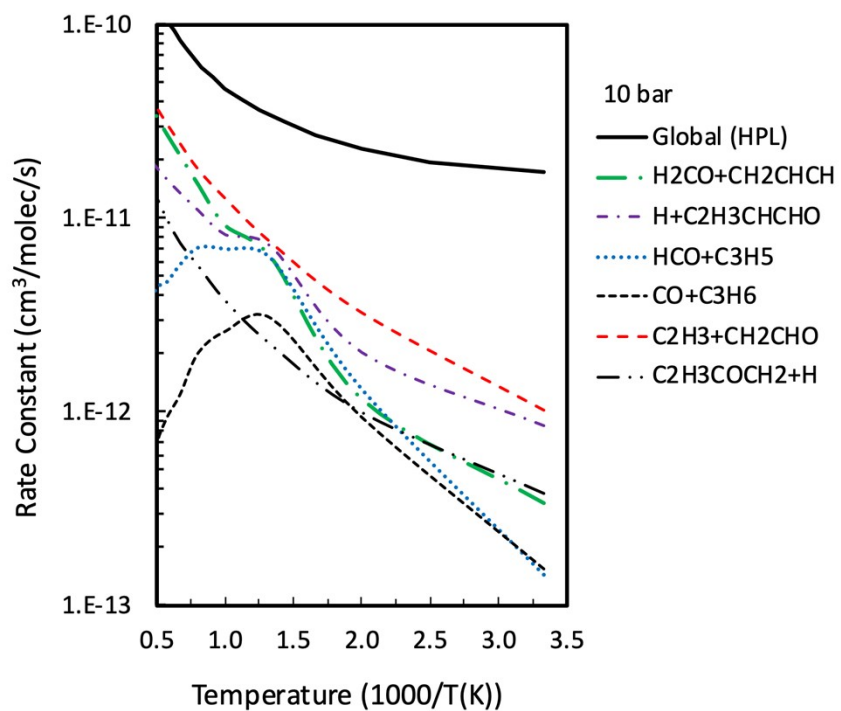

Fig S7. Channel specific rate constants computed as a function of temperature at 10 bar.

Table S1. Rate constants computed through ME simulations in an Ar bath gas at 0.1 bar.

| T(K) | H <sub>2</sub> CO+CH <sub>2</sub> CHCH | H+C <sub>2</sub> H <sub>3</sub> CHCHO | HCO+C <sub>3</sub> H <sub>5</sub> | CO+C <sub>3</sub> H <sub>6</sub> | W2       | W3       | C <sub>2</sub> H <sub>3</sub> +CH <sub>2</sub> CHO | C <sub>2</sub> H <sub>3</sub> COCH <sub>2</sub> +H | Total    |
|------|----------------------------------------|---------------------------------------|-----------------------------------|----------------------------------|----------|----------|----------------------------------------------------|----------------------------------------------------|----------|
| 300  | 3.65E-13                               | 9.26E-13                              | 7.99E-12                          | 6.39E-12                         | 6.84E-14 | 1.78E-14 | 1.11E-12                                           | 3.96E-13                                           | 1.73E-11 |
| 500  | 1.29E-12                               | 2.07E-12                              | 9.50E-12                          | 5.74E-12                         | 4.55E-15 | 3.03E-15 | 3.33E-12                                           | 1.04E-12                                           | 2.30E-11 |
| 750  | 6.31E-12                               | 7.40E-12                              | 1.33E-11                          | 6.03E-12                         | 0.00E+00 | 0.00E+00 | 7.56E-12                                           | 2.24E-12                                           | 4.28E-11 |
| 1000 | 9.24E-12                               | 8.20E-12                              | 8.70E-12                          | 2.94E-12                         | 0.00E+00 | 0.00E+00 | 1.25E-11                                           | 3.96E-12                                           | 4.56E-11 |
| 1250 | 1.46E-11                               | 1.12E-11                              | 7.20E-12                          | 2.03E-12                         | 0.00E+00 | 0.00E+00 | 1.85E-11                                           | 5.50E-12                                           | 5.90E-11 |
| 1500 | 2.06E-11                               | 1.36E-11                              | 5.96E-12                          | 1.18E-12                         | 0.00E+00 | 0.00E+00 | 2.43E-11                                           | 7.82E-12                                           | 7.35E-11 |
| 1750 | 2.64E-11                               | 1.61E-11                              | 4.98E-12                          | 9.89E-13                         | 0.00E+00 | 0.00E+00 | 3.10E-11                                           | 9.72E-12                                           | 8.92E-11 |
| 2000 | 3.31E-11                               | 1.79E-11                              | 4.21E-12                          | 6.10E-13                         | 0.00E+00 | 0.00E+00 | 3.78E-11                                           | 1.21E-11                                           | 1.06E-10 |
| 2200 | 3.83E-11                               | 1.94E-11                              | 3.80E-12                          | 7.05E-13                         | 0.00E+00 | 0.00E+00 | 4.35E-11                                           | 1.35E-11                                           | 1.19E-10 |

Table S2. Rate constants computed through ME simulations in an Ar bath gas at 1 bar.

| T(K) | H <sub>2</sub> CO+CH <sub>2</sub> CHCH | H+C <sub>2</sub> H <sub>3</sub> CHCHO | HCO+C <sub>3</sub> H <sub>5</sub> | CO+C <sub>3</sub> H <sub>6</sub> | W2       | W3       | C <sub>2</sub> H <sub>3</sub> +CH <sub>2</sub> CHO | C <sub>2</sub> H <sub>3</sub> COCH <sub>2</sub> +H | Total    |
|------|----------------------------------------|---------------------------------------|-----------------------------------|----------------------------------|----------|----------|----------------------------------------------------|----------------------------------------------------|----------|
| 300  | 3.21E-13                               | 9.48E-13                              | 3.50E-12                          | 3.35E-12                         | 5.09E-12 | 2.57E-12 | 1.09E-12                                           | 3.91E-13                                           | 1.73E-11 |
| 500  | 1.24E-12                               | 2.13E-12                              | 7.62E-12                          | 5.20E-12                         | 1.51E-12 | 9.58E-13 | 3.22E-12                                           | 1.10E-12                                           | 2.30E-11 |
| 750  | 6.26E-12                               | 7.40E-12                              | 1.26E-11                          | 6.22E-12                         | 2.65E-13 | 1.84E-13 | 7.53E-12                                           | 2.30E-12                                           | 4.28E-11 |
| 1000 | 9.18E-12                               | 8.23E-12                              | 8.65E-12                          | 3.07E-12                         | 1.76E-14 | 1.25E-14 | 1.25E-11                                           | 3.94E-12                                           | 4.56E-11 |
| 1250 | 1.46E-11                               | 1.14E-11                              | 7.09E-12                          | 1.88E-12                         | 0.00E+00 | 0.00E+00 | 1.85E-11                                           | 5.56E-12                                           | 5.90E-11 |
| 1500 | 2.06E-11                               | 1.38E-11                              | 5.72E-12                          | 1.43E-12                         | 0.00E+00 | 0.00E+00 | 2.46E-11                                           | 7.42E-12                                           | 7.35E-11 |
| 1750 | 2.65E-11                               | 1.61E-11                              | 4.94E-12                          | 9.57E-13                         | 0.00E+00 | 0.00E+00 | 3.05E-11                                           | 1.02E-11                                           | 8.92E-11 |
| 2000 | 3.29E-11                               | 1.79E-11                              | 4.50E-12                          | 6.85E-13                         | 0.00E+00 | 0.00E+00 | 3.75E-11                                           | 1.22E-11                                           | 1.06E-10 |
| 2200 | 3.76E-11                               | 1.98E-11                              | 3.95E-12                          | 6.21E-13                         | 0.00E+00 | 0.00E+00 | 4.34E-11                                           | 1.37E-11                                           | 1.19E-10 |

Table S3. Rate constants computed through ME simulations in an Ar bath gas at 10 bar.

| T(K) | H <sub>2</sub> CO+CH <sub>2</sub> CHCH | H+C <sub>2</sub> H <sub>3</sub> CHCHO | HCO+C <sub>3</sub> H <sub>5</sub> | CO+C <sub>3</sub> H <sub>6</sub> | W2       | W3       | C <sub>2</sub> H <sub>3</sub> +CH <sub>2</sub> CHO | C <sub>2</sub> H <sub>3</sub> COCH <sub>2</sub> +H | Total    |
|------|----------------------------------------|---------------------------------------|-----------------------------------|----------------------------------|----------|----------|----------------------------------------------------|----------------------------------------------------|----------|
| 300  | 3.37E-13                               | 8.47E-13                              | 1.45E-13                          | 1.55E-13                         | 1.29E-11 | 1.49E-12 | 1.03E-12                                           | 3.83E-13                                           | 1.73E-11 |
| 500  | 1.16E-12                               | 2.02E-12                              | 1.30E-12                          | 9.42E-13                         | 1.04E-11 | 2.88E-12 | 3.27E-12                                           | 1.00E-12                                           | 2.30E-11 |
| 750  | 6.24E-12                               | 7.16E-12                              | 6.16E-12                          | 3.07E-12                         | 6.97E-12 | 3.40E-12 | 7.55E-12                                           | 2.24E-12                                           | 4.28E-11 |
| 1000 | 9.08E-12                               | 8.22E-12                              | 6.87E-12                          | 2.63E-12                         | 1.34E-12 | 9.64E-13 | 1.27E-11                                           | 3.76E-12                                           | 4.56E-11 |
| 1250 | 1.48E-11                               | 1.10E-11                              | 7.01E-12                          | 2.03E-12                         | 2.58E-13 | 2.32E-13 | 1.80E-11                                           | 5.70E-12                                           | 5.90E-11 |
| 1500 | 2.09E-11                               | 1.35E-11                              | 5.72E-12                          | 1.24E-12                         | 3.43E-14 | 4.95E-14 | 2.46E-11                                           | 7.49E-12                                           | 7.35E-11 |
| 1750 | 2.68E-11                               | 1.59E-11                              | 4.66E-12                          | 9.44E-13                         | 2.27E-14 | 0.00E+00 | 3.10E-11                                           | 9.88E-12                                           | 8.92E-11 |
| 2000 | 3.26E-11                               | 1.82E-11                              | 4.40E-12                          | 7.04E-13                         | 0.00E+00 | 0.00E+00 | 3.72E-11                                           | 1.26E-11                                           | 1.06E-10 |
| 2200 | 3.75E-11                               | 1.99E-11                              | 3.73E-12                          | 4.69E-13                         | 0.00E+00 | 0.00E+00 | 4.30E-11                                           | 1.45E-11                                           | 1.19E-10 |

### S3. Master Equation Inputs

All relevant parameters for the stationary points used in the ME simulations for the triplet PES are reported in the following, while those for the singlet PES are reported in a companion tar archive. For the relative energies please refer to those reported in the paper.

#### TRIPLET PES

Well W1

Species

RRHO

Geometry[angstrom]

11

|   |                 |                 |                 |
|---|-----------------|-----------------|-----------------|
| C | 0.000000000000  | 0.000000000000  | 0.000000000000  |
| C | 0.000000000000  | 0.000000000000  | 1.492704212303  |
| C | 1.155458783516  | 0.000000000000  | 2.244924763724  |
| O | -0.779101618179 | -0.969994211585 | -0.560072298715 |
| H | -0.459161349707 | 0.936321711311  | -0.386368093048 |
| H | 1.019515362745  | -0.004138234940 | -0.413577878279 |
| C | 1.196408012000  | 0.004002067474  | 3.619696777554  |
| H | -0.967852020051 | -0.025388207253 | 1.979743556100  |
| H | 2.100897352464  | -0.000078329259 | 1.709612549092  |
| H | 2.135405525455  | 0.005803240680  | 4.152520349452  |
| H | 0.285770911415  | 0.002908832472  | 4.203764194113  |

Core RigidRotor

SymmetryFactor 1.0000000000000000

End

Rotor

Hindered

Group 4 5 6

Axis 1 2

Symmetry 1

Potential[kcal/mol] 18

|      |      |      |      |      |      |      |      |      |      |      |      |      |      |      |
|------|------|------|------|------|------|------|------|------|------|------|------|------|------|------|
| 0.00 | 0.33 | 1.12 | 1.21 | 0.41 | 0.01 | 0.25 | 1.01 | 1.44 | 1.25 | 0.88 | 0.72 | 0.72 | 0.85 | 1.20 |
| 1.44 | 1.12 | 0.33 |      |      |      |      |      |      |      |      |      |      |      |      |

End

Frequencies[1/cm] 26

|        |        |        |        |        |        |        |        |        |        |
|--------|--------|--------|--------|--------|--------|--------|--------|--------|--------|
| 3264.4 | 3181.9 | 3166.9 | 3153.9 | 2981.5 | 2849.3 | 1527.9 | 1505.1 | 1387.0 | 1352.1 |
| 1290.0 | 1249.5 | 1200.5 | 1145.4 | 1094.9 | 1056.4 | 996.69 | 954.87 | 838.72 | 813.40 |
| 730.42 | 551.83 | 497.88 | 433.33 | 258.08 | 168.83 |        |        |        |        |

ZeroEnergy[kcal/mol] 0.

ElectronicLevels[1/cm] 1

0.0000000000000000 3.0000000000000000

End

End

!\*\*\*\*\*

Well W2

Species

RRHO

Geometry[angstrom]

11

|   |                 |                 |                 |
|---|-----------------|-----------------|-----------------|
| C | 0.000000000000  | 0.000000000000  | 0.000000000000  |
| C | 0.000000000000  | 0.000000000000  | 1.486400000000  |
| C | 1.439463090629  | 0.000000000000  | 2.013399450396  |
| H | -0.148236362138 | -0.922408549564 | -0.540641108899 |

```

H    0.228777675422    0.912021396144   -0.531907734673
C    1.887307090677   -0.890971421977    2.882083470532
H   -0.503593123621   -0.892596974303    1.880719942822
H    2.068697725902    0.786903481845    1.618152724879
H    2.919202557695   -0.882007580107    3.206407821587
H    1.244384802223   -1.660878364341    3.289146710225
O   -0.514504973360    1.157145802708    2.012220942587

```

```

Core RigidRotor
SymmetryFactor 1.0000000000000000

```

End

```

Rotor           Hindered

```

```

Group 6 8 9 10
Axis   3   2
Symmetry 1

```

```

Potential[kcal/mol] 18
0.00 0.42 1.83 3.35 0.59 0.22 0.48 1.36 1.77 2.50 1.92 1.74 1.88 2.32 2.71
2.54 1.43 0.42

```

End

```

Frequencies[1/cm] 26
3293.9 3252.7 3202.8 3173.0 3161.9 2997.1 1694.6 1443.2 1426.2 1348.6
1318.7 1268.6 1165.0 1086.8 1031.6 1022.2 984.02 902.50 848.64 663.71
525.89 512.13 360.25 349.16 282.12 168.12

```

```

ZeroEnergy[kcal/mol] 0.
ElectronicLevels[1/cm] 1
0.0000000000000000E+000 3.0000000000000000

```

End

End

!\*\*\*\*\*

Well W3

Species

RRHO ! transition state

```

Geometry[angstrom] 11
C 0.00087 0.00395 0.00350
C 0.00287 -0.00476 1.47851
C 1.24174 -0.00469 2.24894
C 1.37089 -0.63874 3.54363
H -0.86566 -0.43402 1.96713
H 2.08294 0.52857 1.81353
H 1.18632 -0.09065 4.46147
H 1.69110 -1.67009 3.64379
O -0.29292 1.18079 0.71872
H 0.95091 0.00165 -0.52176
H -0.83287 -0.44605 -0.52658

```

```

Core RigidRotor
SymmetryFactor 1.0000000000000000

```

End

```

Frequencies[1/cm] 27
64.625 266.45 295.78 421.77 470.83 508.88 633.74 801.32 857.46 940.83
959.00 1078.2 1108.2 1163.3 1175.6 1201.3 1275.2 1288.3 1443.1 1451.2
1526.2 3096.4 3113.9 3133.6 3147.5 3187.8 3200.5

```

```

ZeroEnergy[kcal/mol] $wellpen
ElectronicLevels[1/cm] 1
0.0000000000000000 3.0000000000000000

```

End

End

!\*\*\*\*\*



Barrier TS1

RRHO ! transition state

Geometry[angstrom] 11

C 0.00000 0.00000 0.00000  
C 0.00000 0.00000 1.34473  
C 1.20279 0.00000 2.14988  
H -0.92019 0.04690 -0.56352  
H 0.92305 0.04916 -0.56210  
C 1.19663 -0.01751 3.48136  
H -0.94562 -0.02081 1.87512  
H 2.14736 0.01299 1.61615  
H 2.11490 -0.01657 4.05129  
H 0.26799 -0.03478 4.03850  
O -0.10163 -2.29724 -0.04848

Core RigidRotor

SymmetryFactor 0.5000000000000000

End

Rotor Hindered

Group 6 8 9 10

Axis 3 2

Symmetry 1

Potential[kcal/mol] 18

0.00 0.66 2.41 4.83 5.92 5.17 3.63 2.45 2.42 3.14 2.69 2.59 3.55 5.12 6.03

4.96 2.60

0.69

End

Frequencies[1/cm] 25

3254.9 3250.8 3176.3 3168.3 3164.9 3155.7 1693.9 1634.3 1481.4 1416.2  
1330.5 1316.4 1237.0 1050.8 1009.2 997.80 968.86 964.85 908.44 781.35  
565.07 524.02 300.20 182.24 102.27

ZeroEnergy[kcal/mol] -0.54

ElectronicLevels[1/cm] 1

0.0000000000000000 3.0000000000000000

End

End

!\*\*\*\*\*

Barrier TS2

RRHO ! transition state

Geometry[angstrom] 11

C 0.000000000000 0.000000000000 0.000000000000  
C 0.000000000000 0.000000000000 1.446351424719  
C 1.178314641204 0.000000000000 2.189202354961  
O -1.032513430906 0.184193647439 -0.666209136615  
H 0.988668637599 0.088299051901 -0.484526528081  
C 1.225947762809 0.004032989263 3.552079818855  
H -0.965759260329 -0.003982783482 1.936659509488  
H 2.115227759731 -0.004276002005 1.639880413971  
H 2.166813789808 0.003325533630 4.082359760907  
H 0.318187029448 0.008885168454 4.141021258855  
H 0.129124433760 -1.693080480756 -0.463145834508

Core RigidRotor

SymmetryFactor 1.0000000000000000

End

Frequencies[1/cm] 26

138.15 208.46 223.90 466.72 497.50 538.33 549.02 587.26 818.78 894.47

976.46 1012.4 1037.6 1152.4 1221.5 1293.1 1298.3 1394.0 1489.4 1523.6  
 1578.4 2939.4 3155.1 3163.7 3193.5 3262.7  
 ZeroEnergy[kcal/mol] 16.76  
 ElectronicLevels[1/cm] 1  
 0.0000000000000000E+000 3.0000000000000000  
 Tunneling Eckart  
 ImaginaryFrequency[1/cm] 1020.104400000000  
 WellDepth[kcal/mol] 16.76  
 WellDepth[kcal/mol] 16.76

End  
End

!\*\*\*\*\*

Barrier TS3 REACS PRODS

RRHO ! transition state  
 Geometry[angstrom] 11  
 C 0.00000 0.00000 0.00000  
 C 0.00000 0.00000 2.22666  
 C 1.19578 0.00000 2.88222  
 C 2.44330 0.15360 2.32501  
 H -1.02470 -0.10086 2.54631  
 H 1.13301 -0.13919 3.96227  
 H 3.32447 0.12783 2.94815  
 H 2.56157 0.31652 1.26340  
 O 0.79705 0.85242 -0.34984  
 H 0.29006 -1.06169 0.07651  
 H -1.08278 0.20630 0.02610  
 Core RigidRotor  
 SymmetryFactor 1.0000000000000000

End

Rotor Hindered

Group 9 10 11

Axis 1 2

Symmetry 1

Potential[kcal/mol] 18

0.00 0.02 0.05 0.04 0.01 0.02 0.29 0.91 1.33 1.21 0.84 0.56 0.62 0.96 1.30  
1.26 0.71

0.16

End

Frequencies[1/cm] 25  
 3275.5 3251.9 3170.4 3091.7 2982.0 2922.1 1682.7 1515.7 1501.2 1419.6  
 1260.7 1254.0 1207.5 1100.1 1030.4 923.14 909.53 854.74 593.87 546.34  
 522.16 486.97 273.68 144.50 142.12

ZeroEnergy[kcal/mol] 22.51  
 ElectronicLevels[1/cm] 1  
 0.0000000000000000 3.0000000000000000

Tunneling Eckart  
 ImaginaryFrequency[1/cm] 260.10000000000002  
 WellDepth[kcal/mol] 22.51  
 WellDepth[kcal/mol] 12.55

End  
End

!\*\*\*\*\*

Barrier TS4 REACS WP

RRHO ! transition state

Geometry[angstrom] 11  
 C 0.000000000000 0.000000000000 0.000000000000

```

C      0.000000000000    0.000000000000    1.360204187449
C      1.236420960526    0.000000000000    2.141928742491
H     -0.918629166807   -0.092086310583   -0.560308859280
H      0.915216889322    0.159549790611   -0.553855057696
C      1.265815067664   -0.166493698316    3.458645523374
H     -0.910019443540   -0.244076856904    1.892054117170
H      2.156462195292    0.157441471397    1.590371361826
H      2.196872939222   -0.160218431085    4.007492375581
H      0.355383347700   -0.310544125567    4.027004699785
O     -0.233542653576    2.000967293530    1.558263997808
  Core RigidRotor
    SymmetryFactor 0.5000000000000000
  End
Rotor                               Hindered
Group  6  8  9 10
Axis    3    2
Symmetry 1
Potential[kcal/mol] 18
  0.00 0.42 1.94 3.96 4.85 3.97 2.38 1.48 1.64 1.92 1.69 1.96 3.24 4.50 4.93
4.16 2.32
0.63
End
  Frequencies[1/cm] 25
  3268.0 3256.4 3206.5 3182.8 3168.3 3163.5 1723.1 1577.8 1477.3 1405.5
  1331.9 1295.7 1231.5 1030.7 1009.9 994.66 963.81 900.58 885.93 700.20
  521.78 514.09 307.23 232.92 77.250
ZeroEnergy[kcal/mol] 0.35
ElectronicLevels[1/cm] 1
0.0000000000000000 3.0000000000000000
  Tunneling Eckart
  ImaginaryFrequency[1/cm] 381.56000000000000
  WellDepth[kcal/mol] 0.35
  WellDepth[kcal/mol] 18.87
End
End
!*****
Barrier TS5 REACS WR
RRHO ! transition state
Geometry[angstrom] 11
C 0.00000 0.00000 0.00000
C 0.00000 0.00000 1.31630
C 1.06551 0.00000 2.29340
H -0.91871 0.00000 -0.56987
H 0.93522 -0.00000 -0.55264
C 0.88633 0.00000 3.60895
H -1.19233 0.00000 1.85067
H 2.07075 -0.00000 1.87821
H 1.72932 0.00000 4.28486
H -0.10688 0.00000 4.03871
O -2.29026 0.00000 2.31196
  Core RigidRotor
    SymmetryFactor 1.0000000000000000
  End
Rotor                               Hindered
Group  6  8  9 10
Axis    3    2

```

```

Symmetry      1
Potential[kcal/mol]      18
  0.00  0.42  1.48  2.45  2.55  1.93  1.34  1.42  2.33  3.04  2.33  1.42  1.34  1.93  2.55
2.45  1.48
  0.42
End
  Frequencies[1/cm]      25
  3260.3  3234.2  3166.9  3135.2  3128.9  1739.9  1682.5  1460.0  1415.4  1318.2
  1224.5  1082.2  1016.0  995.12  988.17  959.18  923.38  892.99  739.82  576.90
  492.79  457.77  264.69  248.24  112.30
ZeroEnergy[kcal/mol]      7.65
ElectronicLevels[1/cm]      1
0.000000000000000000  6.0000000000000000
  Tunneling Eckart
  ImaginaryFrequency[1/cm]  1532.1400000000001
  WellDepth[kcal/mol]      7.65
  WellDepth[kcal/mol]      7.65
End
End
!*****
Barrier TS6 REACS WP
RRHO ! transition state
Geometry[angstrom]      11
C      0.000000000000  0.000000000000  0.000000000000
C      0.000000000000  0.000000000000  1.434152619110
O      1.087469193795  0.000000000000  2.071213305400
H      0.917501611357  0.223888152947  -0.524781782173
H      -0.898353879127  -0.226477148671  -0.556263894219
H      -0.909247645356  -0.379007235461  1.923495232740
C      -0.616871765084  1.938025491914  2.032706402918
C      -0.789170778170  2.817125648040  1.086742029839
H      -0.707716003131  1.946283504620  3.106509461612
H      -0.596264436222  2.577248153574  0.045573134606
H      -1.134252312516  3.823769448344  1.305886626521
  Core RigidRotor
  SymmetryFactor  1.0000000000000000
End
Rotor      Hindered
Group  8  9  10  11
Axis    7    2
Symmetry      1
Potential[kcal/mol]      18
  0.00  0.17  0.63  1.00  0.97  0.78  0.74  0.89  1.07  1.14  1.04  0.95  0.92  0.89  0.85
0.78  0.53
  0.18
End
  Frequencies[1/cm]      25
  3280.4  3269.2  3191.1  3163.8  3114.1  2981.9  1675.3  1483.5  1460.5  1394.3
  1347.3  1155.1  1109.2  964.14  943.56  920.99  882.54  823.05  710.93  515.43
  425.70  393.03  338.52  238.05  172.33
ZeroEnergy[kcal/mol]      6.59
ElectronicLevels[1/cm]      1
0.0000000000000000E+000  3.0000000000000000
  Tunneling Eckart
  ImaginaryFrequency[1/cm]  391.1400000000000
  WellDepth[kcal/mol]      6.59

```

WellDepth[kcal/mol] 14.50

End

End

!\*\*\*\*\*

Barrier TS7 REACS WP

RRHO ! transition state

Geometry[angstrom] 11

|   |                 |                 |                 |
|---|-----------------|-----------------|-----------------|
| C | 0.000000000000  | 0.000000000000  | 0.000000000000  |
| C | 0.000000000000  | 0.000000000000  | 1.478821264963  |
| C | 1.159222139269  | 0.000000000000  | 2.222354789373  |
| C | 1.202455532189  | 0.068884285640  | 3.674711570643  |
| H | -0.962389152117 | 0.012891969772  | 1.967963617072  |
| H | 2.100769660868  | -0.001673289559 | 1.675749645188  |
| H | 1.314953390385  | 1.021583993360  | 4.176735197866  |
| H | 1.219853622156  | -0.828095936499 | 4.279698965100  |
| O | -0.042353437516 | 1.342424930646  | 0.295305547044  |
| H | 0.915081410725  | -0.352765852500 | -0.483260332456 |
| H | -0.897892695678 | -0.409501271595 | -0.467654917747 |

Core RigidRotor

SymmetryFactor 1.00000000000000

End

Frequencies[1/cm] 26

|        |        |        |        |        |        |        |        |        |        |
|--------|--------|--------|--------|--------|--------|--------|--------|--------|--------|
| 166.98 | 254.57 | 275.57 | 373.38 | 438.39 | 523.50 | 720.39 | 901.99 | 984.11 | 989.07 |
| 1035.2 | 1110.1 | 1168.1 | 1212.8 | 1273.8 | 1291.0 | 1300.8 | 1441.1 | 1495.6 | 1532.5 |
| 3026.9 | 3089.1 | 3115.8 | 3140.4 | 3226.8 | 3237.7 |        |        |        |        |

ZeroEnergy[kcal/mol] 0.

ElectronicLevels[1/cm] 1

0.0000000000000000E+000 3.0000000000000000

Tunneling Eckart

ImaginaryFrequency[1/cm] 513.0793000000000

WellDepth[kcal/mol] 0.

WellDepth[kcal/mol] 0.

End

End

!\*\*\*\*\*

Barrier TS8 REACS WP

RRHO ! transition state

Geometry[angstrom] 11

|   |          |          |          |
|---|----------|----------|----------|
| C | 0.00000  | 0.00000  | 0.00000  |
| C | 0.00000  | 0.00000  | 1.47166  |
| C | 1.28664  | 0.00000  | 2.24031  |
| H | -0.57044 | -0.73227 | -0.55085 |
| H | 0.51559  | 0.78095  | -0.53920 |
| C | 2.48344  | 0.42240  | 1.73119  |
| H | -0.72033 | -0.70941 | 1.88891  |
| H | 1.22071  | -0.36395 | 3.25470  |
| H | 3.37117  | 0.42930  | 2.34637  |
| H | 2.56583  | 0.78330  | 0.71654  |
| O | -0.00608 | 1.23826  | 2.09099  |

Core RigidRotor

SymmetryFactor 1.0000000000000000

End

Rotor Hindered

Group 8 9 10 11

Axis 7 2

Symmetry 1

```

Potential[kcal/mol]      18
  0.00  0.17  0.63  1.00  0.97  0.78  0.74  0.89  1.07  1.14  1.04  0.95  0.92  0.89  0.85
0.78  0.53
0.18
End
  Frequencies[1/cm]      26
  130.79  235.19  295.70  401.18  513.98  531.13  590.10  841.40  848.10  925.25
  972.89  1048.9  1112.2  1164.7  1237.2  1294.0  1403.5  1407.3  1476.0  1531.1
  3042.7  3169.7  3173.6  3223.9  3272.4  3282.6
ZeroEnergy[kcal/mol]      4.87
ElectronicLevels[1/cm]      1
0.000000000000000000  3.0000000000000000
  Tunneling Eckart
ImaginaryFrequency[1/cm]  501.97910000000002
WellDepth[kcal/mol]      4.87
WellDepth[kcal/mol]      2.24

```

End

End

!\*\*\*\*\*

Barrier TS10 REACS PRODS

RRHO ! transition state

```

Geometry[angstrom]      11
C  0.00000  0.00000  0.00000
C  0.00000  0.00000  1.43664
C  1.28636  0.00000  2.20568
H  0.90096 -0.10268 -0.58480
H -0.94961  0.10197 -0.50228
C  2.50750 -0.06274  1.69571
H -0.20094 -1.62798  1.89476
H  1.13628  0.08327  3.27514
H  3.37562 -0.03393  2.33927
H  2.69593 -0.14456  0.63366
O -1.05923  0.33457  2.03517
  Core RigidRotor
  SymmetryFactor  1.0000000000000000

```

End

Rotor Hindered

Group 8 9 10 11

Axis 7 2

Symmetry 1

```

Potential[kcal/mol]      18
  0.00  0.17  0.63  1.00  0.97  0.78  0.74  0.89  1.07  1.14  1.04  0.95  0.92  0.89  0.85
0.78  0.53  0.18

```

End

```

  Frequencies[1/cm]      26
  79.918  303.99  325.76  392.06  480.97  501.68  515.94  619.81  690.61  779.25
  836.42  982.44  994.08  1045.7  1068.3  1305.4  1318.9  1427.0  1470.0  1486.2
  1721.1  3166.1  3180.4  3193.3  3251.6  3293.6
ZeroEnergy[kcal/mol]      13.22
ElectronicLevels[1/cm]      1
0.000000000000000000  3.0000000000000000
  Tunneling Eckart
ImaginaryFrequency[1/cm]  1051.0806000000000
WellDepth[kcal/mol]      0.01
WellDepth[kcal/mol]      0.01

```

End

```

End
!*****
!*****
Barrier MECP REACS PRODS
RRHO ! transition state
Geometry[angstrom] 11
C 0.000000 0.000000 0.000000
C 0.000000 0.000000 1.496202
C 1.158853 0.000000 2.246685
O -0.510920 -1.193219 -0.450116
H -0.679179 0.783987 -0.378834
H 0.999067 0.205698 -0.406429
O 1.197611 -0.030153 3.620032
H -0.964375 -0.074963 1.984070
H 2.102252 0.038882 1.710024
H 2.135194 -0.010547 4.155274
H 0.286678 -0.073502 4.202259
Core RigidRotor
SymmetryFactor 1.0000000000000000
End
Rotor Hindered
Group 4 5 6
Axis 1 2
Symmetry 1
Potential[kcal/mol] 18
0.00 0.33 1.12 1.21 0.41 0.01 0.25 1.01 1.44 1.25 0.88 0.72 0.72 0.85 1.20
1.44 1.12
0.33
End
Frequencies[1/cm] 25
3262.6 3184.0 3162.8 3148.8 3004.1 2867.0 1523.8 1498.9 1422.2 1357.3
1294.0 1216.3 1197.3 1113.2 1074.3 1010.1 986.79 954.88 837.20 760.35
633.63 554.31 483.81 285.10 177.59
ZeroEnergy[kcal/mol] 0.
ElectronicLevels[1/cm] 1
0.0000000000000000 3.0000000000000000
End
!*****

```



## REFERENCES

- 1 M. Alagia, V. Aquilanti, D. Ascenzi, N. Balucani, D. Cappelletti, L. Cartechini, P. Casavecchia, F. Pirani, G. Sanchini and G. G. Volpi, *Isr. J. Chem.*, 1997, **37**, 329-342.
- 2 F. Leonori, N. Balucani, G. Capozza, E. Segoloni, G. G. Volpi and P. Casavecchia, *Phys. Chem. Chem. Phys.*, 2014, **16**, 10008 – 10022.
- 3 P. Casavecchia, *Rep. Prog. Phys.*, 2000, **63**, 355-414.
- 4 P. Casavecchia, F. Leonori and N. Balucani, *Int. Rev. Phys. Chem.*, 2015, **34**, 161-204.
- 5 R. D. Levine, *Molecular Reaction Dynamics*, Cambridge University Press, 2005.
- 6 W. B. Miller, S. A. Safron and D. R. Herschbach, *Discuss. Faraday Soc.*, 1967, **44**, 108-123.
- 7 G. A. Fisk, J. D. McDonald and D. R. Herschbach, General discussion, *Discuss. Faraday Soc.*, 1967, **44**, 228-230.
- 8 A. Caracciolo, P. Recio, N. Balucani, M. Rosi, C. Cavallotti and P. Casavecchia, work in progress.
- 9 P. Casavecchia, K. Liu and X. Yang, Reactive scattering: reactions in three dimensions. In: *Tutorials in Molecular Reaction Dynamics*, Mark Brouard & Claire Vallance, eds. (Royal Society of Chemistry Publishing, Cambridge, UK), Ch. VI (2010), pp. 167-213.
